# Supplementary material for: Comparable Pregnancy Loss and Neonatal Birthweights in Frozen Embryo Transfer Cycles Using Vitrified Embryos from Progestin-Primed Ovarian Stimulation and GnRH Analogue Protocols: A Retrospective Cohort Study
Source: MDPI journal article supplement (doi:10.3390/jcm11206151), 2022-10-19

**Supplemental Table S1. The baseline characteristics of the original data.**

| Characteristics                 | GnRH analogue<br>(n=2532) | PPOS<br>(n=11810) | P value |
|---------------------------------|---------------------------|-------------------|---------|
| Maternal age (yrs)              | 31.63±3.53                | 31.47±3.77        | 0.05    |
| 23-29                           | 806(31.8%)                | 4455(37.7%)       |         |
| 30-34                           | 1264(49.9%)               | 5117(43.3%)       |         |
| 35-37                           | 395(15.6%)                | 1654(14.0%)       |         |
| 38-42                           | 67(2.6%)                  | 584(4.9%)         |         |
| Paternal age (yrs) n=14059      | 33.69±4.75                | 33.34±4.88        | 0.001   |
| 20-34                           | 1640(65.3%)               | 8035(68.6%)       |         |
| 35-44                           | 824(32.8%)                | 3446(29.4%)       |         |
| 45-55                           | 49(1.9%)                  | 234(2.0%)         |         |
| BMI (kg/m <sup>2</sup> )        |                           |                   | 0.01    |
| <18.5                           | 301(11.9%)                | 1328(11.2%)       |         |
| 18.5-22.9                       | 1542(60.9%)               | 7141(60.5%)       |         |
| 23-27.4                         | 616(24.3%)                | 2833(24.0%)       |         |
| ≥27.5                           | 73(2.9%)                  | 508(4.3%)         |         |
| Infertility duration (yrs)      |                           |                   | 0.01    |
| 1-3                             | 1563(61.7%)               | 7755(65.7%)       |         |
| ≥4                              | 969(38.3%)                | 4055(34.3%)       |         |
| Gravidity                       |                           |                   | 0.56    |
| 0                               | 1357(53.6%)               | 6445(54.6%)       |         |
| 1                               | 642(25.4%)                | 2880(24.4%)       |         |
| ≥2                              | 533(21.1%)                | 2485(21.0%)       |         |
| No of miscarriages n=12144      |                           |                   | 0.75    |
| 0                               | 754(84.4%)                | 9604(85.4%)       |         |
| 1                               | 113(12.7%)                | 1342(11.9%)       |         |
| ≥2                              | 26(2.9%)                  | 305(2.7%)         |         |
| No of induced abortions n=12144 |                           |                   | 0.274   |
| 0                               | 689(77.2%)                | 8909(79.2%)       |         |
| 1-2                             | 188(21.1%)                | 2175(19.3%)       |         |
| ≥3                              | 16(1.8%)                  | 167(1.5%)         |         |
| Parity                          |                           |                   | 0.69    |
| 0                               | 2341(92.5%)               | 10946(92.7%)      |         |
| ≥1                              | 191(7.5%)                 | 864(7.3%)         |         |
| Previous IVF attempts           |                           |                   | <0.001  |
| 0                               | 1909(75.4%)               | 9696(82.1%)       |         |
| 1-2                             | 402(15.9%)                | 1358(11.5%)       |         |
| ≥3                              | 221(8.7%)                 | 756(6.4%)         |         |
| Infertility indications         |                           |                   | <0.001  |
| Tubal                           | 1096(43.3%)               | 4209(35.6%)       |         |
| Male                            | 376(14.8%)                | 1480(12.5%)       |         |
| Endometriosis                   | 123(4.8%)                 | 467(4.0%)         |         |

|                                    |             |              |        |
|------------------------------------|-------------|--------------|--------|
| Dysfunctional ovulation            | 108(4.3%)   | 717(6.1%)    |        |
| Uterine                            | 106(4.2%)   | 704(6.0%)    |        |
| Unknown                            | 243(9.6%)   | 1108(9.4%)   |        |
| Combined                           | 480(19.0%)  | 3125(26.5%)  |        |
| Basic FSH value(mIU/ml)            | 5.52±1.54   | 5.68±1.63    | <0.001 |
| Oocyte yields                      |             |              | 0.005  |
| 1-5                                | 369(14.6%)  | 1622(13.7%)  |        |
| 6-15                               | 1482(58.5%) | 6631(56.1%)  |        |
| 16-35                              | 681(26.9%)  | 3557(30.1%)  |        |
| Fertilization methods              |             |              | 0.226  |
| IVF                                | 1610(63.6%) | 7279(61.6%)  |        |
| ICSI                               | 611(24.1%)  | 3023(25.6%)  |        |
| IVF+ICSI                           | 311(12.3%)  | 1508(12.8%)  |        |
| Endometrium preparation            |             |              | <0.001 |
| Natural cycle                      | 725(28.6%)  | 2687(22.8%)  |        |
| Mild stimulation                   | 1183(46.7%) | 5739(48.6%)  |        |
| HRT                                | 624(24.6%)  | 3384(28.7%)  |        |
| Endometrium thickness (mm) n=14231 |             |              | 0.054  |
| <8mm                               | 167(6.6%)   | 909(7.8%)    |        |
| ≥8mm                               | 2348(93.4%) | 10807(92.2%) |        |
| Embryo stage                       |             |              | 0.001  |
| Cleavage                           | 721(81.3%)  | 8224(85.4%)  |        |
| Blastocyst                         | 166(18.7%)  | 1407(14.6%)  |        |
| Embryos transferred                |             |              | 0.82   |
| 1                                  | 316(12.5%)  | 1493(12.6%)  |        |
| 2                                  | 2216(87.5%) | 10317(87.4%) |        |

**Supplemental Table S2. Pregnancy outcome of positive HCG woman between GnRH analogue and PPOS groups using the original data.**

|                                              | GnRH analogue<br>(n=2532) | PPOS<br>(n=11810) | Adjusted OR<br>(95%CI) * | P<br>value |
|----------------------------------------------|---------------------------|-------------------|--------------------------|------------|
| <b>Pregnancy loss</b>                        | 487(19.2%)                | 2231(18.9%)       | 0.98(0.87,1.09)          | 0.66       |
| Biochemical pregnancy loss                   | 66(2.3%)                  | 423(3.6%)         |                          |            |
| Ectopic pregnancy                            | 50(2.0%)                  | 326(2.8%)         |                          |            |
| Early miscarriage (6-11 weeks)               | 309(12.2%)                | 1027(8.7%)        |                          |            |
| Late miscarriage (12-24 weeks)               | 57(2.3%)                  | 432(3.6%)         |                          |            |
| Stillbirth (>24weeks)                        | 5(0.2%)                   | 24(0.2%)          |                          |            |
| <b>Live birth</b>                            | 2045(80.8%)               | 9579(81.1%)       | 1.03(0.92,1.14)          | 0.66       |
| <b>Gestational weeks at delivery n=11623</b> |                           |                   |                          | 0.089      |
| ≤32 (weeks)                                  | 38(1.9%)                  | 258(2.7%)         |                          |            |
| 33-36 (weeks)                                | 308(15.1%)                | 1456(15.2%)       |                          |            |

|                                 |              |              |                 |       |
|---------------------------------|--------------|--------------|-----------------|-------|
| >=37 (weeks)                    | 1699(82.1%)  | 7864(82.1%)  |                 |       |
| <b>Birth weight (g) n=11533</b> |              |              |                 |       |
| Single n (%)                    | 1546         | 6908         |                 |       |
| Newborn weight(g)               | 3352.8±520.2 | 3338.1±504.5 |                 | 0.30  |
| Twins                           | 473          | 2606         |                 |       |
| Newborn weight(g)               | 2537.1±423.8 | 2506.2±429.4 |                 | 0.15  |
| <b>Mode of delivery n=11593</b> |              |              |                 | 0.001 |
| Vaginal                         | 404(19.9%)   | 2212(23.1%)  |                 |       |
| Cesarean section                | 1628(80.1%)  | 7349(76.9%)  |                 |       |
| Low birthweight (<2500g)        | 94(4.6%)     | 458(4.8%)    | 1.05(0.83,1.31) | 0.70  |
| High birthweight (>4000g)       | 343(16.8%)   | 1387(14.5%)  | 0.83(0.73,0.94) | 0.005 |
| Neonatal events                 | 88(4.2%)     | 352(3.7%)    | 0.86(0.68,1.10) | 0.23  |
| Congenital anomalies            | 35(1.7%)     | 257(2.6%)    | 1.53(1.07,2.19) | 0.019 |

\* Adjusted by maternal age, paternal age, BMI, infertile duration, IVF failures and the oocyte yields.

**Supplemental Table S3. The birthweights of FET cycles in matched cases without pregnancy complications**

|                                                     | GnRH analogue<br>(n=1846) | PPOS<br>(n=3607) | OR (95%CI)      | P value |
|-----------------------------------------------------|---------------------------|------------------|-----------------|---------|
| <b>Live birth</b>                                   | 1495(81.0%)               | 2874(79.7%)      | 0.95(0.86,1.04) | 0.25    |
| <b>Gestational weeks at delivery (weeks) n=4369</b> |                           |                  |                 | 0.009   |
| <=32                                                | 27(1.8%)                  | 73(2.5%)         |                 |         |
| 33-36                                               | 167(11.2%)                | 383(13.3%)       |                 |         |
| >=37                                                | 1301(87.0%)               | 2317(84.1%)      |                 |         |
| <b>Birth weight (g) n=4369</b>                      |                           |                  |                 |         |
| Single n (%)                                        | 1144                      | 2134             |                 |         |
| Newborn weight(g)                                   | 3349±515.8                | 3348.3±479.7     |                 | 0.93    |
| Twins                                               | 351                       | 740              |                 |         |
| Newborn weight(g)                                   | 2536.2±424.7              | 2518.9±417.2     |                 | 0.53    |
| Low birthweight (<2500g)<br>n=4329                  | 186(12.5%)                | 349(12.2%)       | 0.97(0.80,1.17) | 0.75    |
| High birthweight (>4000g)<br>n=4329                 | 104(7.0%)                 | 165(5.8%)        | 0.81(0.63,1.05) | 0.11    |
| Neonatal events<br>n=4329                           | 68(4.6%)                  | 99(3.5%)         | 0.75(0.54,1.02) | 0.068   |
| Congenital anomalies<br>n=4329                      | 24(1.6%)                  | 68(2.4%)         | 1.48(0.93,2.37) | 0.10    |

**Supplemental Table S4. Pregnancy outcome of positive HCG woman between GnRH analogue and PPOS in matched cases stratified by embryo stage**

|                                      | GnRH analogue<br>(n=1913) | PPOS<br>(n=3831) | OR (95%CI)      | P<br>value |
|--------------------------------------|---------------------------|------------------|-----------------|------------|
| <b>Cleavage embryo transfer</b>      |                           |                  |                 |            |
| Live birth                           | 1461(81.6%)               | 2740(80.8%)      | 1.01(0.97,1.05) | 0.64       |
| Gestational weeks at delivery n=3747 |                           |                  |                 | 0.75       |
| <=32 weeks                           | 27(2.4%)                  | 76(2.9%)         |                 |            |
| 33-36 weeks                          | 167(15.1%)                | 397(15.0%)       |                 |            |
| >=37 weeks                           | 914(82.5%)                | 2166(82.1%)      |                 |            |
| Birth weight (g) n=4165              |                           |                  |                 |            |
| Single n (%)                         | 1092                      | 1968             |                 |            |
| Newborn weight(g)                    | 3342.9±515.5              | 3331.4±487.2     |                 | 0.54       |
| Twins                                | 351                       | 754              |                 |            |
| Newborn weight(g)                    | 2430.2±423.1              | 2504.6±421.5     |                 | 0.35       |
| <b>Blastocyst transfer</b>           |                           |                  |                 |            |
| Live birth                           | 100(81.3%)                | 357(81.5%)       | 1.0(0.90,1.12)  | 0.96       |
| Gestational weeks at delivery n=457  |                           |                  |                 | 0.34       |
| <=32 weeks                           | 1(1.0%)                   | 13(3.6%)         |                 |            |
| 33-36 weeks                          | 13(13.0%)                 | 53(14.8%)        |                 |            |
| >=37 weeks                           | 86(86.0%)                 | 291(81.5%)       |                 |            |
| Birth weight (g) n=452               |                           |                  |                 |            |
| Single n (%)                         | 91                        | 294              |                 |            |
| Newborn weight(g)                    | 3383.7±517.0              | 3374.0±540.0     |                 | 0.88       |
| Twins                                | 9                         | 58               |                 |            |
| Newborn weight(g)                    | 2648.3±477.2              | 2394.6±512.7     |                 | 0.17       |

**Figure S1: The density of propensity score before and after the match.**

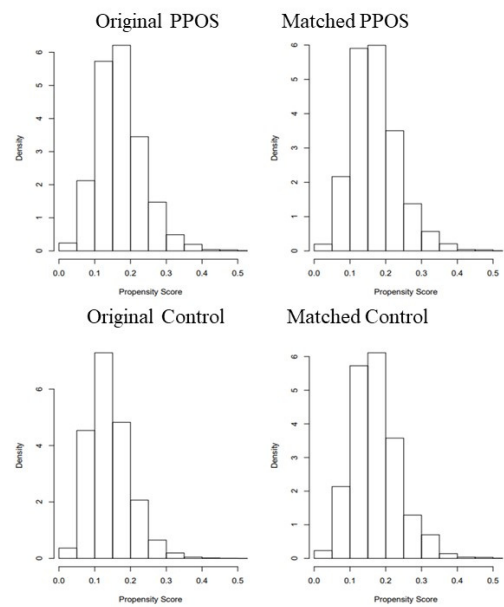

Supplement: s1 [file s1]
